# Supplementary material
Source: Springer Nature journal article supplement (https://www.springermedizin.de/resource/supplementary/12889_2013_6349_MOESM3_ESM.pdf/9497612)

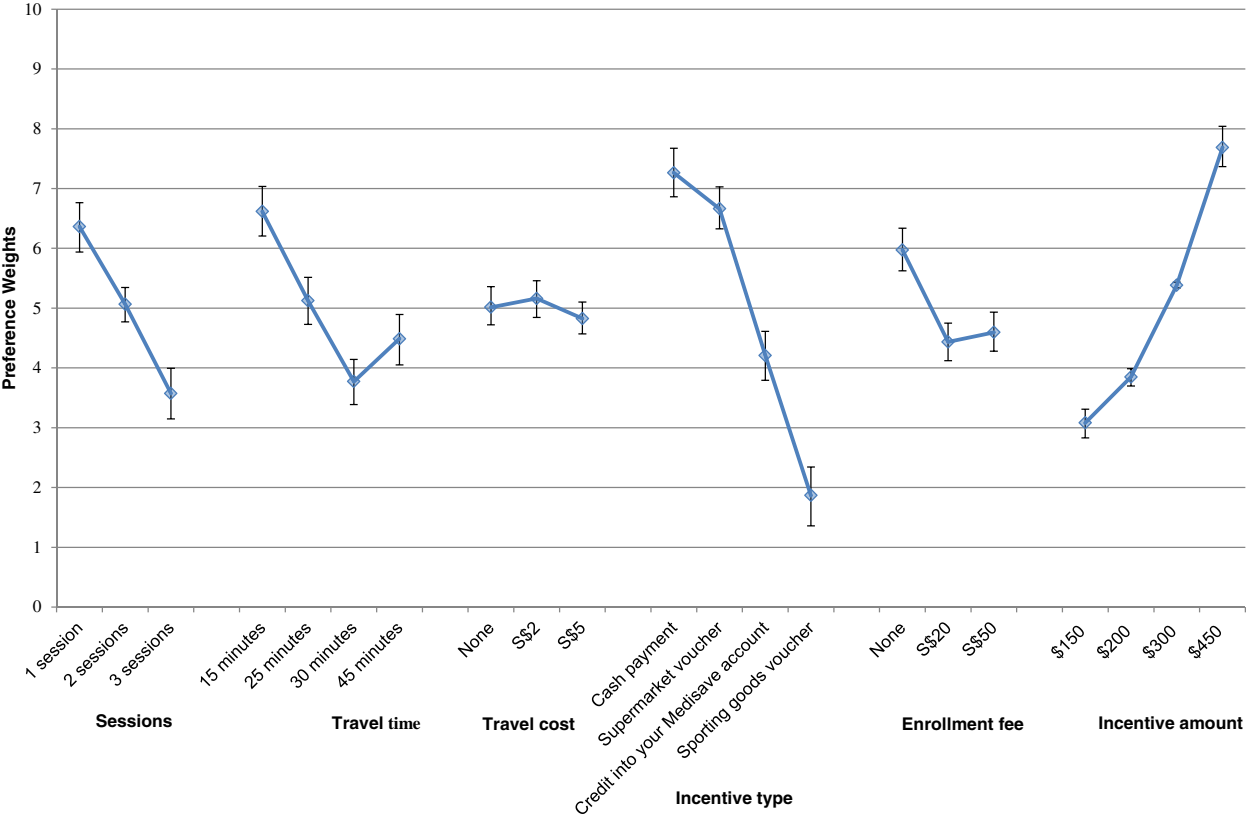

Supplement: MOESM3 [file 9497612]
